# Supplementary material for: Identification of a novel combination treatment strategy in clear cell renal cell carcinoma stem cells with shikonin and ipilimumab
Source: Frontiers journal article supplement (doi:10.3389/fimmu.2023.1186388), 2023-08-09
Supplement: Data_Sheet_1.PDF [file Data_Sheet_1.PDF]

## *Supplementary Material*

### **Identification of novel combination treatment strategy in clear cell renal cell carcinoma stem cells with shikonin and ipilimumab**

**Chen Lyu<sup>1</sup>, Birgit Stadlbauer<sup>1,2</sup>, Lili Wang<sup>1,3</sup>, Alexander Buchner<sup>1,2</sup>, Heike Pohla<sup>1,2\*</sup>**

<sup>1</sup>Tumor Immunology Laboratory, LIFE Center, LMU Klinikum, University Munich, Germany

<sup>2</sup>Department of Urology, LMU Klinikum, University Munich, Germany

<sup>3</sup>Department of Radiology, First Affiliated Hospital, Zhejiang University School of Medicine, Hangzhou, China

**\* Correspondence:**

Heike Pohla

heike.pohla@med.uni-muenchen.de

## Supplementary Figures

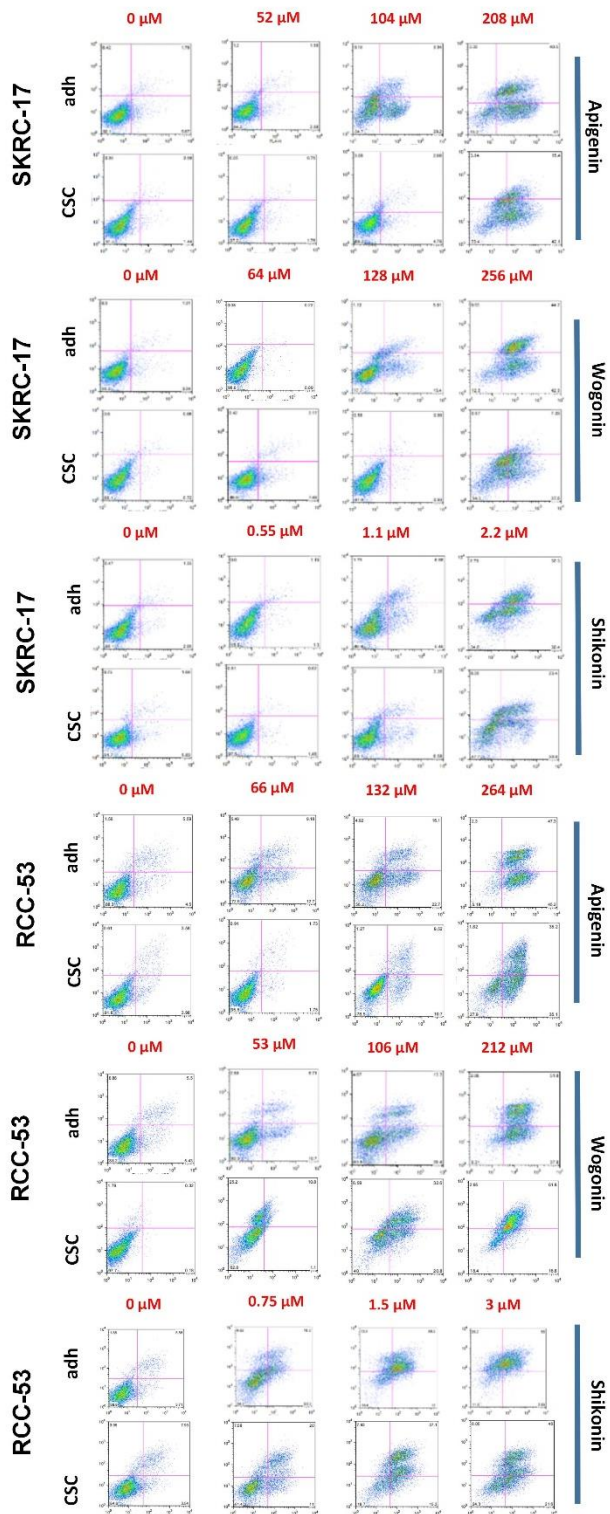

**Supplementary Figure S1. Apoptosis assay.** SKRC-17 adherent cell, SKRC-17 CSCs, RCC-53 adherent cells and RCC-53 CSCs were treated with apigenin, wogonin, and shikonin.

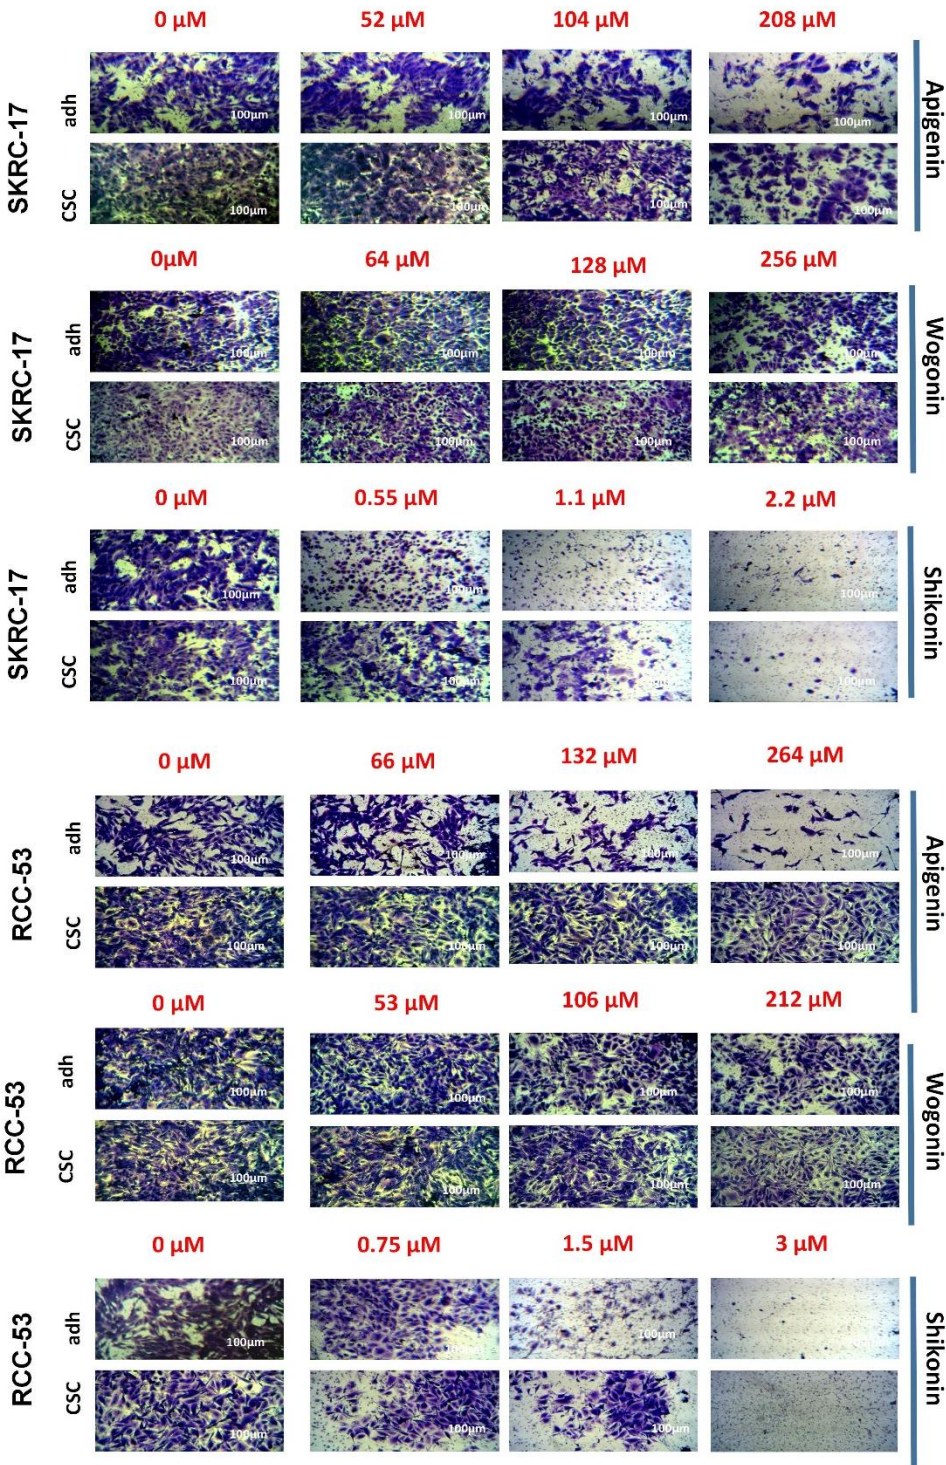

**Supplementary Figure S2. Invasion assay.** Photos were taken at the magnification of 40x and the cells were counted (three fields per insert; Fiji ImageJ software).

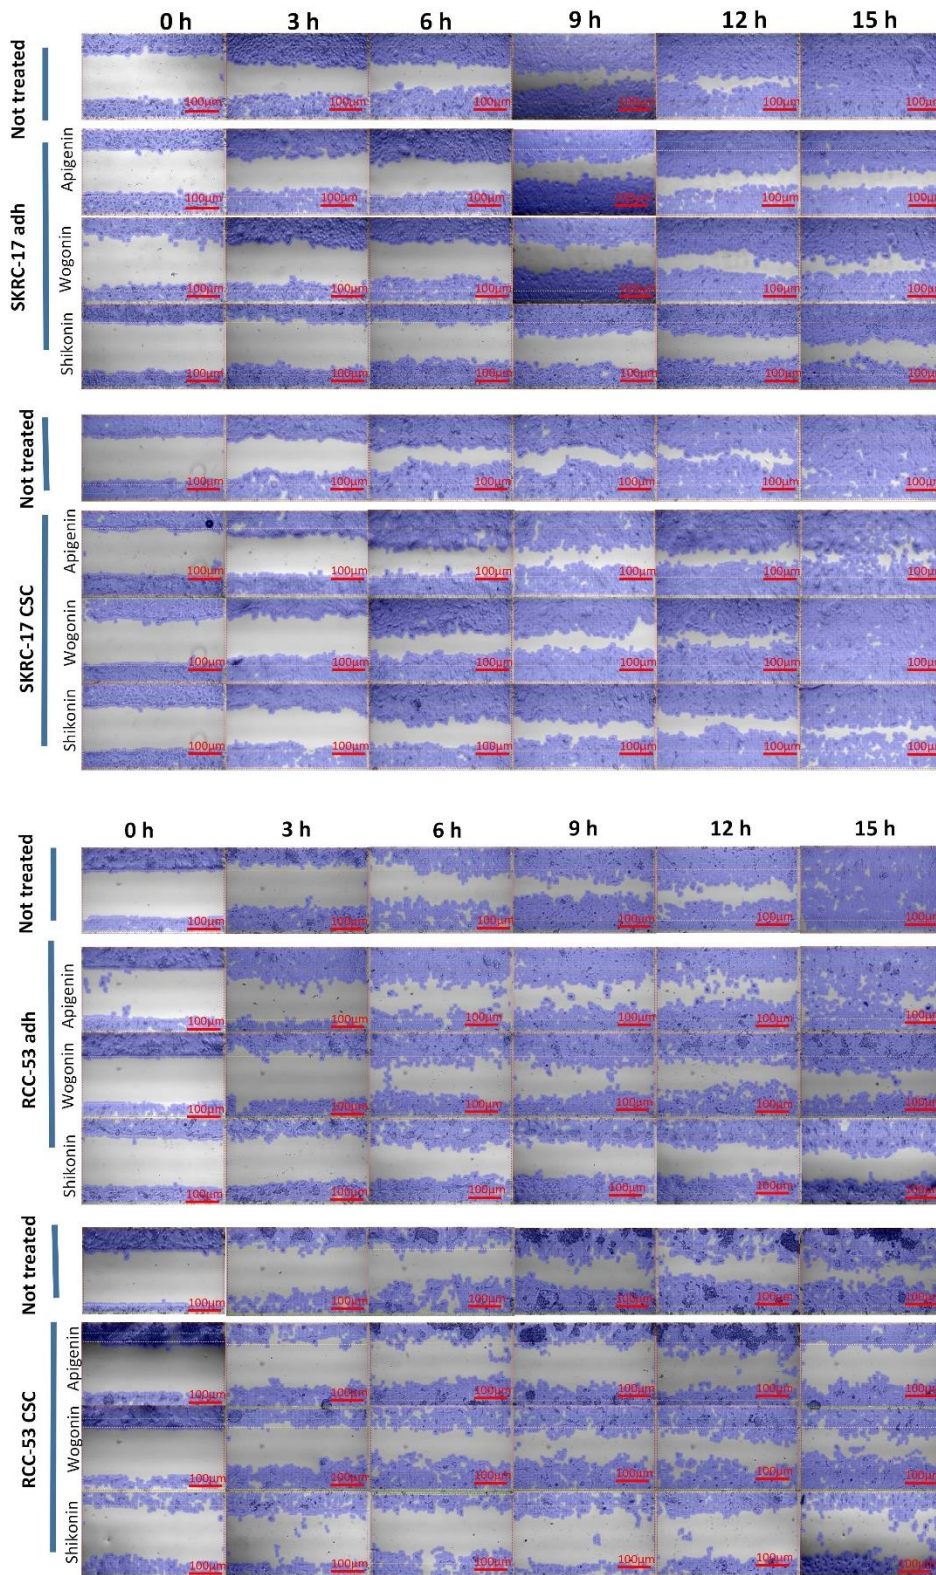

**Supplementary Figure S3. Migration assay.** Photos were taken under the microscope at different time points at the magnification of 40× (Bresser GmbH DE-46414 Rhede Germany).

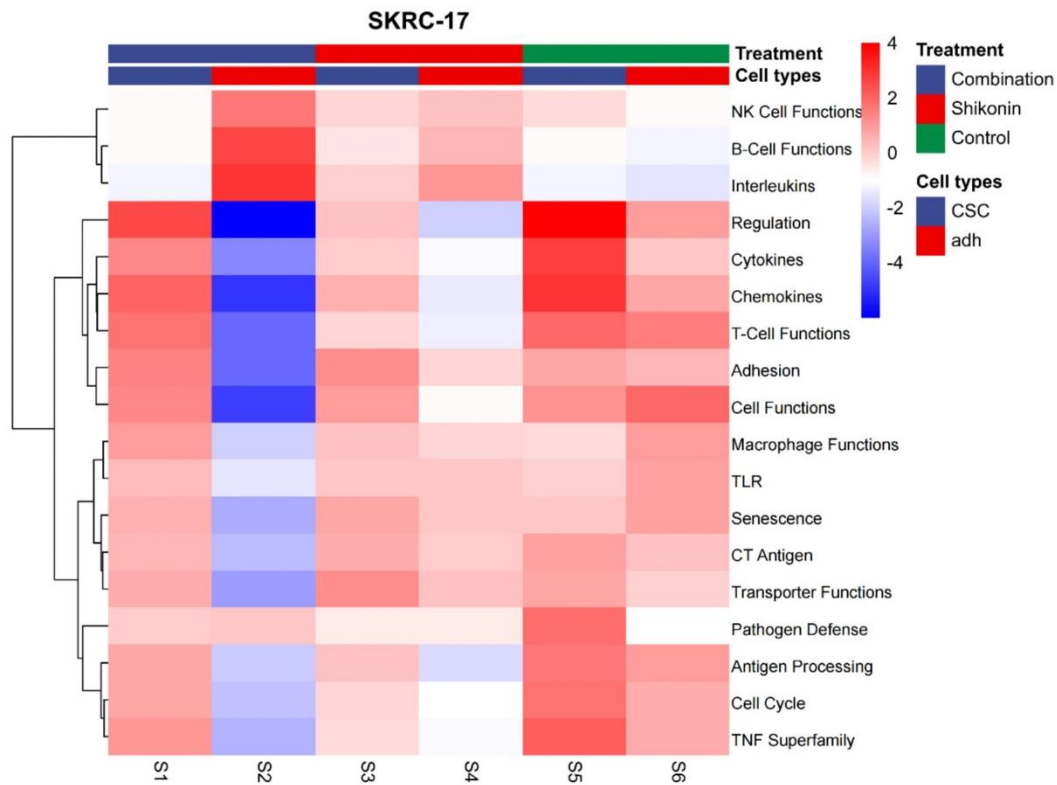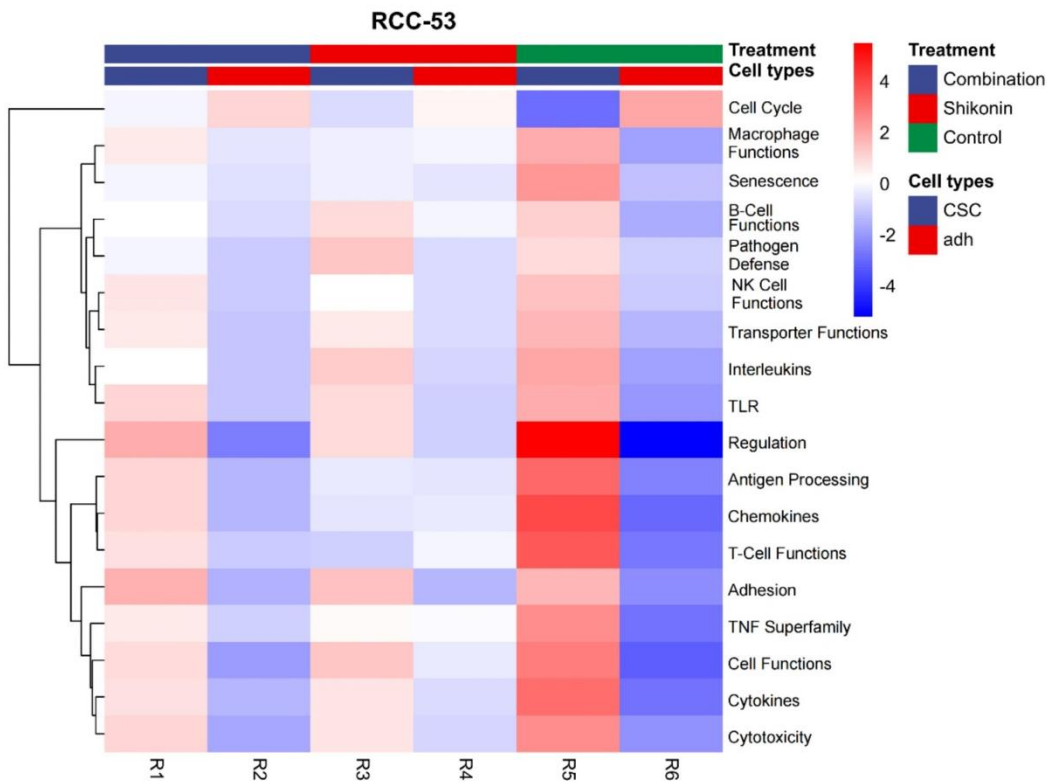

**Supplementary Figure S4. Heatmap of the differentially expressed pathways.** Between CSCs and adherent cells, groups were treated with or without shikonin or with the combination shikonin plus ipilimumab (NanoString analysis).
